# Supplementary material for: COPD in Germany: Use of Diagnostic Measures Including Blood Eosinophil Counts in Daily Practice
Source: PubMed Central journal article supplement — Pneumologie. 2020 Dec 11;75(5):344–52. doi: 10.1055/a-1266-6602 (PMC8093015; doi:10.1055/a-1266-6602), 2020-12-11
Supplement: 106supmat_10-1055-a-1266-6602.pdf [file 106supmat_10-1055-a-1266-6602.pdf]

## Supplementary material

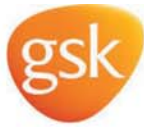

COPD UDM | DQ

### Arztfragebogen

Einsatz von diagnostischen Maßnahmen bei Patienten mit COPD.  
Eine nicht-interventionelle Studie in pneumologischen Schwerpunktpraxen  
zur Auswirkung auf Behandlungsentscheidungen.

#### Institution

Art der Institution:  Krankenhaus  
 Niedergelassene Praxis

Anzahl der betreuten COPD-Patienten: \_\_\_\_\_

Erfahrung in der Atemwegsmedizin:  < 1 Jahr  
 1 Jahr - < 10 Jahre  
 ≥ 10 Jahre

#### Pathogenese der Erkrankung

Was sind Ihrer Meinung nach relevante Faktoren, die zur Entstehung einer COPD beitragen?

Bitte alle zutreffenden Punkte ankreuzen

- Genetische und intrinsische Faktoren (Lungenentwicklung)
- Frühere Komorbiditäten (Infektionen, Asthma)
- Lebensstil, z.B. Rauchen
- Umweltfaktoren, z.B. Verschmutzung
- Krankheiten mit entzündlichen Faktoren
- Krankheiten allergischer Herkunft / mit allergischen Komponenten
- Sonstige – Bitte spezifizieren:

---



---



---



---

## Supplementary material

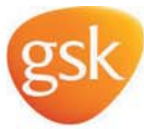

COPD UDM | DQ

## Einsatz und Relevanz von diagnostischen Maßnahmen

Bitte bewerten Sie die in der untenstehenden Tabelle gelisteten diagnostischen Maßnahmen hinsichtlich der folgenden Fragestellungen - Bitte alle zutreffenden Punkte ankreuzen

- A. Welche diagnostischen Tests verwenden Sie üblicherweise, nachdem Sie den Patienten anamnestisch und körperlich untersucht haben?  
 B. Bitte geben Sie den Zeitpunkt / die Häufigkeit der diagnostischen Tests an  
 C. Bitte beurteilen Sie die Relevanz der diagnostischen Tests in der täglichen Praxis  
 D. Bitte beurteilen Sie den Nutzen der diagnostischen Tests für die Patienten

|                                       | A. Nutzen Sie diese Maßnahme üblicherweise?            | B. Zeitpunkt / Häufigkeit der Durchführung |                          |                                          |                             |                                   |                                             | C. Relevant in der täglichen Praxis?                   | D. Nutzen für die Patienten                                 |                                                            |
|---------------------------------------|--------------------------------------------------------|--------------------------------------------|--------------------------|------------------------------------------|-----------------------------|-----------------------------------|---------------------------------------------|--------------------------------------------------------|-------------------------------------------------------------|------------------------------------------------------------|
|                                       |                                                        | Zur Diagnosestellung                       | Zu jeder Visite          | Abhängig vom klinischen Erscheinungsbild | Im Falle von Exazerbationen | Ungefähr alle 3 Monate oder öfter | Regelmäßig, aber seltener als alle 3 Monate |                                                        |                                                             |                                                            |
| Thorax-Computertomographie (CT)       | <input type="radio"/> Ja<br><input type="radio"/> Nein | <input type="checkbox"/>                   | <input type="checkbox"/> | <input type="checkbox"/>                 | <input type="checkbox"/>    | <input type="checkbox"/>          | <input type="checkbox"/>                    | <input type="radio"/> Ja<br><input type="radio"/> Nein | <input type="radio"/> Kein<br><input type="radio"/> Niedrig | <input type="radio"/> Mittel<br><input type="radio"/> Hoch |
| Röntgen des Thorax                    | <input type="radio"/> Ja<br><input type="radio"/> Nein | <input type="checkbox"/>                   | <input type="checkbox"/> | <input type="checkbox"/>                 | <input type="checkbox"/>    | <input type="checkbox"/>          | <input type="checkbox"/>                    | <input type="radio"/> Ja<br><input type="radio"/> Nein | <input type="radio"/> Kein<br><input type="radio"/> Niedrig | <input type="radio"/> Mittel<br><input type="radio"/> Hoch |
| Ganzkörperplethysmographie            | <input type="radio"/> Ja<br><input type="radio"/> Nein | <input type="checkbox"/>                   | <input type="checkbox"/> | <input type="checkbox"/>                 | <input type="checkbox"/>    | <input type="checkbox"/>          | <input type="checkbox"/>                    | <input type="radio"/> Ja<br><input type="radio"/> Nein | <input type="radio"/> Kein<br><input type="radio"/> Niedrig | <input type="radio"/> Mittel<br><input type="radio"/> Hoch |
| Spirometrie                           | <input type="radio"/> Ja<br><input type="radio"/> Nein | <input type="checkbox"/>                   | <input type="checkbox"/> | <input type="checkbox"/>                 | <input type="checkbox"/>    | <input type="checkbox"/>          | <input type="checkbox"/>                    | <input type="radio"/> Ja<br><input type="radio"/> Nein | <input type="radio"/> Kein<br><input type="radio"/> Niedrig | <input type="radio"/> Mittel<br><input type="radio"/> Hoch |
| Dermatologisches / Allergie-Screening | <input type="radio"/> Ja<br><input type="radio"/> Nein | <input type="checkbox"/>                   | <input type="checkbox"/> | <input type="checkbox"/>                 | <input type="checkbox"/>    | <input type="checkbox"/>          | <input type="checkbox"/>                    | <input type="radio"/> Ja<br><input type="radio"/> Nein | <input type="radio"/> Kein<br><input type="radio"/> Niedrig | <input type="radio"/> Mittel<br><input type="radio"/> Hoch |
| Alpha-1-Antitrypsin-Mangel Screening  | <input type="radio"/> Ja<br><input type="radio"/> Nein | <input type="checkbox"/>                   | <input type="checkbox"/> | <input type="checkbox"/>                 | <input type="checkbox"/>    | <input type="checkbox"/>          | <input type="checkbox"/>                    | <input type="radio"/> Ja<br><input type="radio"/> Nein | <input type="radio"/> Kein<br><input type="radio"/> Niedrig | <input type="radio"/> Mittel<br><input type="radio"/> Hoch |
| IgE – Gesamt                          | <input type="radio"/> Ja<br><input type="radio"/> Nein | <input type="checkbox"/>                   | <input type="checkbox"/> | <input type="checkbox"/>                 | <input type="checkbox"/>    | <input type="checkbox"/>          | <input type="checkbox"/>                    | <input type="radio"/> Ja<br><input type="radio"/> Nein | <input type="radio"/> Kein<br><input type="radio"/> Niedrig | <input type="radio"/> Mittel<br><input type="radio"/> Hoch |
| IgE – Spezifische Allergene           | <input type="radio"/> Ja<br><input type="radio"/> Nein | <input type="checkbox"/>                   | <input type="checkbox"/> | <input type="checkbox"/>                 | <input type="checkbox"/>    | <input type="checkbox"/>          | <input type="checkbox"/>                    | <input type="radio"/> Ja<br><input type="radio"/> Nein | <input type="radio"/> Kein<br><input type="radio"/> Niedrig | <input type="radio"/> Mittel<br><input type="radio"/> Hoch |
| Eosinophile im Blut                   | <input type="radio"/> Ja<br><input type="radio"/> Nein | <input type="checkbox"/>                   | <input type="checkbox"/> | <input type="checkbox"/>                 | <input type="checkbox"/>    | <input type="checkbox"/>          | <input type="checkbox"/>                    | <input type="radio"/> Ja<br><input type="radio"/> Nein | <input type="radio"/> Kein<br><input type="radio"/> Niedrig | <input type="radio"/> Mittel<br><input type="radio"/> Hoch |
| Eosinophile im Sputum                 | <input type="radio"/> Ja<br><input type="radio"/> Nein | <input type="checkbox"/>                   | <input type="checkbox"/> | <input type="checkbox"/>                 | <input type="checkbox"/>    | <input type="checkbox"/>          | <input type="checkbox"/>                    | <input type="radio"/> Ja<br><input type="radio"/> Nein | <input type="radio"/> Kein<br><input type="radio"/> Niedrig | <input type="radio"/> Mittel<br><input type="radio"/> Hoch |
| Blutbild mit Gesamtleukozyten         | <input type="radio"/> Ja<br><input type="radio"/> Nein | <input type="checkbox"/>                   | <input type="checkbox"/> | <input type="checkbox"/>                 | <input type="checkbox"/>    | <input type="checkbox"/>          | <input type="checkbox"/>                    | <input type="radio"/> Ja<br><input type="radio"/> Nein | <input type="radio"/> Kein<br><input type="radio"/> Niedrig | <input type="radio"/> Mittel<br><input type="radio"/> Hoch |
| Blutbild mit Differentialblutbild     | <input type="radio"/> Ja<br><input type="radio"/> Nein | <input type="checkbox"/>                   | <input type="checkbox"/> | <input type="checkbox"/>                 | <input type="checkbox"/>    | <input type="checkbox"/>          | <input type="checkbox"/>                    | <input type="radio"/> Ja<br><input type="radio"/> Nein | <input type="radio"/> Kein<br><input type="radio"/> Niedrig | <input type="radio"/> Mittel<br><input type="radio"/> Hoch |
| COPD Assessment Test (CAT)            | <input type="radio"/> Ja<br><input type="radio"/> Nein | <input type="checkbox"/>                   | <input type="checkbox"/> | <input type="checkbox"/>                 | <input type="checkbox"/>    | <input type="checkbox"/>          | <input type="checkbox"/>                    | <input type="radio"/> Ja<br><input type="radio"/> Nein | <input type="radio"/> Kein<br><input type="radio"/> Niedrig | <input type="radio"/> Mittel<br><input type="radio"/> Hoch |
| Dyspnoe Assessment (mMRC)             | <input type="radio"/> Ja<br><input type="radio"/> Nein | <input type="checkbox"/>                   | <input type="checkbox"/> | <input type="checkbox"/>                 | <input type="checkbox"/>    | <input type="checkbox"/>          | <input type="checkbox"/>                    | <input type="radio"/> Ja<br><input type="radio"/> Nein | <input type="radio"/> Kein<br><input type="radio"/> Niedrig | <input type="radio"/> Mittel<br><input type="radio"/> Hoch |
| Sonstige 1                            | <input type="radio"/> Ja<br><input type="radio"/> Nein | <input type="checkbox"/>                   | <input type="checkbox"/> | <input type="checkbox"/>                 | <input type="checkbox"/>    | <input type="checkbox"/>          | <input type="checkbox"/>                    | <input type="radio"/> Ja<br><input type="radio"/> Nein | <input type="radio"/> Kein<br><input type="radio"/> Niedrig | <input type="radio"/> Mittel<br><input type="radio"/> Hoch |
| Sonstige 2                            | <input type="radio"/> Ja<br><input type="radio"/> Nein | <input type="checkbox"/>                   | <input type="checkbox"/> | <input type="checkbox"/>                 | <input type="checkbox"/>    | <input type="checkbox"/>          | <input type="checkbox"/>                    | <input type="radio"/> Ja<br><input type="radio"/> Nein | <input type="radio"/> Kein<br><input type="radio"/> Niedrig | <input type="radio"/> Mittel<br><input type="radio"/> Hoch |
| Sonstige 3                            | <input type="radio"/> Ja<br><input type="radio"/> Nein | <input type="checkbox"/>                   | <input type="checkbox"/> | <input type="checkbox"/>                 | <input type="checkbox"/>    | <input type="checkbox"/>          | <input type="checkbox"/>                    | <input type="radio"/> Ja<br><input type="radio"/> Nein | <input type="radio"/> Kein<br><input type="radio"/> Niedrig | <input type="radio"/> Mittel<br><input type="radio"/> Hoch |

## Supplementary material

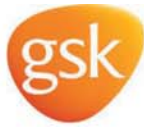

COPD UDM | DQ

## Motive für den Einsatz diagnostischer Maßnahmen

Bitte geben Sie die Motive für den Einsatz der folgenden diagnostischen Maßnahmen an:

Bitte alle zutreffenden Punkte ankreuzen

|                                       | Motive für den Einsatz diagnostischer Maßnahmen |                                           |                                                  |                                                         |                                                      |                                                      |                                         |                                           |           |
|---------------------------------------|-------------------------------------------------|-------------------------------------------|--------------------------------------------------|---------------------------------------------------------|------------------------------------------------------|------------------------------------------------------|-----------------------------------------|-------------------------------------------|-----------|
|                                       | Nützlich für die Diagnostik (COPD)              | Nützlich für die Verlaufskontrolle (COPD) | Nützlich für die Diagnostik (Begleitkrankheiten) | Nützlich für die Verlaufskontrolle (Begleitkrankheiten) | Nützlich für die kurzfristige Kontrolle der Therapie | Nützlich für die langfristige Kontrolle der Therapie | Nützlich für die Anpassung der Therapie | Empfehlungen von Leitlinien oder Kollegen | Sonstiges |
| Thorax-Computertomographie (CT)       | <input type="checkbox"/>                        | <input type="checkbox"/>                  | <input type="checkbox"/>                         | <input type="checkbox"/>                                | <input type="checkbox"/>                             | <input type="checkbox"/>                             | <input type="checkbox"/>                | <input type="checkbox"/>                  |           |
| Röntgen des Thorax                    | <input type="checkbox"/>                        | <input type="checkbox"/>                  | <input type="checkbox"/>                         | <input type="checkbox"/>                                | <input type="checkbox"/>                             | <input type="checkbox"/>                             | <input type="checkbox"/>                | <input type="checkbox"/>                  |           |
| Ganzkörperplethysmographie            | <input type="checkbox"/>                        | <input type="checkbox"/>                  | <input type="checkbox"/>                         | <input type="checkbox"/>                                | <input type="checkbox"/>                             | <input type="checkbox"/>                             | <input type="checkbox"/>                | <input type="checkbox"/>                  |           |
| Spirometrie                           | <input type="checkbox"/>                        | <input type="checkbox"/>                  | <input type="checkbox"/>                         | <input type="checkbox"/>                                | <input type="checkbox"/>                             | <input type="checkbox"/>                             | <input type="checkbox"/>                | <input type="checkbox"/>                  |           |
| Dermatologisches / Allergie-Screening | <input type="checkbox"/>                        | <input type="checkbox"/>                  | <input type="checkbox"/>                         | <input type="checkbox"/>                                | <input type="checkbox"/>                             | <input type="checkbox"/>                             | <input type="checkbox"/>                | <input type="checkbox"/>                  |           |
| Alpha-1-Antitrypsin-Mangel Screening  | <input type="checkbox"/>                        | <input type="checkbox"/>                  | <input type="checkbox"/>                         | <input type="checkbox"/>                                | <input type="checkbox"/>                             | <input type="checkbox"/>                             | <input type="checkbox"/>                | <input type="checkbox"/>                  |           |
| IgE – Gesamt                          | <input type="checkbox"/>                        | <input type="checkbox"/>                  | <input type="checkbox"/>                         | <input type="checkbox"/>                                | <input type="checkbox"/>                             | <input type="checkbox"/>                             | <input type="checkbox"/>                | <input type="checkbox"/>                  |           |
| IgE – Spezifische Allergene           | <input type="checkbox"/>                        | <input type="checkbox"/>                  | <input type="checkbox"/>                         | <input type="checkbox"/>                                | <input type="checkbox"/>                             | <input type="checkbox"/>                             | <input type="checkbox"/>                | <input type="checkbox"/>                  |           |
| Eosinophile im Blut                   | <input type="checkbox"/>                        | <input type="checkbox"/>                  | <input type="checkbox"/>                         | <input type="checkbox"/>                                | <input type="checkbox"/>                             | <input type="checkbox"/>                             | <input type="checkbox"/>                | <input type="checkbox"/>                  |           |
| Eosinophile im Sputum                 | <input type="checkbox"/>                        | <input type="checkbox"/>                  | <input type="checkbox"/>                         | <input type="checkbox"/>                                | <input type="checkbox"/>                             | <input type="checkbox"/>                             | <input type="checkbox"/>                | <input type="checkbox"/>                  |           |
| Blutbild mit Gesamtleukozyten         | <input type="checkbox"/>                        | <input type="checkbox"/>                  | <input type="checkbox"/>                         | <input type="checkbox"/>                                | <input type="checkbox"/>                             | <input type="checkbox"/>                             | <input type="checkbox"/>                | <input type="checkbox"/>                  |           |
| Blutbild mit Differentialblutbild     | <input type="checkbox"/>                        | <input type="checkbox"/>                  | <input type="checkbox"/>                         | <input type="checkbox"/>                                | <input type="checkbox"/>                             | <input type="checkbox"/>                             | <input type="checkbox"/>                | <input type="checkbox"/>                  |           |
| COPD Assessment Test (CAT)            | <input type="checkbox"/>                        | <input type="checkbox"/>                  | <input type="checkbox"/>                         | <input type="checkbox"/>                                | <input type="checkbox"/>                             | <input type="checkbox"/>                             | <input type="checkbox"/>                | <input type="checkbox"/>                  |           |
| Dyspnoe Assessment (mMRC)             | <input type="checkbox"/>                        | <input type="checkbox"/>                  | <input type="checkbox"/>                         | <input type="checkbox"/>                                | <input type="checkbox"/>                             | <input type="checkbox"/>                             | <input type="checkbox"/>                | <input type="checkbox"/>                  |           |
| Sonstige 1<br>_____                   | <input type="checkbox"/>                        | <input type="checkbox"/>                  | <input type="checkbox"/>                         | <input type="checkbox"/>                                | <input type="checkbox"/>                             | <input type="checkbox"/>                             | <input type="checkbox"/>                | <input type="checkbox"/>                  |           |
| Sonstige 2<br>_____                   | <input type="checkbox"/>                        | <input type="checkbox"/>                  | <input type="checkbox"/>                         | <input type="checkbox"/>                                | <input type="checkbox"/>                             | <input type="checkbox"/>                             | <input type="checkbox"/>                | <input type="checkbox"/>                  |           |
| Sonstige 3<br>_____                   | <input type="checkbox"/>                        | <input type="checkbox"/>                  | <input type="checkbox"/>                         | <input type="checkbox"/>                                | <input type="checkbox"/>                             | <input type="checkbox"/>                             | <input type="checkbox"/>                | <input type="checkbox"/>                  |           |

## Supplementary material

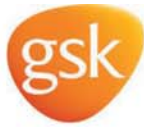

COPD UDM | DQ

## Hindernisse für den Einsatz diagnostischer Maßnahmen

Bitte geben Sie die Hindernisse für den Einsatz der folgenden diagnostischen Maßnahmen an:

Bitte alle zutreffenden Punkte ankreuzen

|                                       | Hindernisse für den Einsatz diagnostischer Maßnahmen |                                                |                          |                                     |                                |           |
|---------------------------------------|------------------------------------------------------|------------------------------------------------|--------------------------|-------------------------------------|--------------------------------|-----------|
|                                       | Hohe Kosten / keine Rückerstattung (PKV / GKV)       | Nicht von der Nützlichkeit des Tests überzeugt | Schwierige Logistik      | Geringe Akzeptanz bei den Patienten | Nicht von Leitlinien empfohlen | Sonstiges |
| Thorax-Computertomographie (CT)       | <input type="checkbox"/>                             | <input type="checkbox"/>                       | <input type="checkbox"/> | <input type="checkbox"/>            | <input type="checkbox"/>       |           |
| Röntgen des Thorax                    | <input type="checkbox"/>                             | <input type="checkbox"/>                       | <input type="checkbox"/> | <input type="checkbox"/>            | <input type="checkbox"/>       |           |
| Ganzkörperplethysmographie            | <input type="checkbox"/>                             | <input type="checkbox"/>                       | <input type="checkbox"/> | <input type="checkbox"/>            | <input type="checkbox"/>       |           |
| Spirometrie                           | <input type="checkbox"/>                             | <input type="checkbox"/>                       | <input type="checkbox"/> | <input type="checkbox"/>            | <input type="checkbox"/>       |           |
| Dermatologisches / Allergie-Screening | <input type="checkbox"/>                             | <input type="checkbox"/>                       | <input type="checkbox"/> | <input type="checkbox"/>            | <input type="checkbox"/>       |           |
| Alpha-1-Antitrypsin-Mangel Screening  | <input type="checkbox"/>                             | <input type="checkbox"/>                       | <input type="checkbox"/> | <input type="checkbox"/>            | <input type="checkbox"/>       |           |
| IgE – Gesamt                          | <input type="checkbox"/>                             | <input type="checkbox"/>                       | <input type="checkbox"/> | <input type="checkbox"/>            | <input type="checkbox"/>       |           |
| IgE – Spezifische Allergene           | <input type="checkbox"/>                             | <input type="checkbox"/>                       | <input type="checkbox"/> | <input type="checkbox"/>            | <input type="checkbox"/>       |           |
| Eosinophile im Blut                   | <input type="checkbox"/>                             | <input type="checkbox"/>                       | <input type="checkbox"/> | <input type="checkbox"/>            | <input type="checkbox"/>       |           |
| Eosinophile im Sputum                 | <input type="checkbox"/>                             | <input type="checkbox"/>                       | <input type="checkbox"/> | <input type="checkbox"/>            | <input type="checkbox"/>       |           |
| Blutbild mit Gesamtleukozyten         | <input type="checkbox"/>                             | <input type="checkbox"/>                       | <input type="checkbox"/> | <input type="checkbox"/>            | <input type="checkbox"/>       |           |
| Blutbild mit Differentialblutbild     | <input type="checkbox"/>                             | <input type="checkbox"/>                       | <input type="checkbox"/> | <input type="checkbox"/>            | <input type="checkbox"/>       |           |
| COPD Assessment Test (CAT)            | <input type="checkbox"/>                             | <input type="checkbox"/>                       | <input type="checkbox"/> | <input type="checkbox"/>            | <input type="checkbox"/>       |           |
| Dyspnoe Assessment (mMRC)             | <input type="checkbox"/>                             | <input type="checkbox"/>                       | <input type="checkbox"/> | <input type="checkbox"/>            | <input type="checkbox"/>       |           |
| Sonstige 1<br>_____                   | <input type="checkbox"/>                             | <input type="checkbox"/>                       | <input type="checkbox"/> | <input type="checkbox"/>            | <input type="checkbox"/>       |           |
| Sonstige 2<br>_____                   | <input type="checkbox"/>                             | <input type="checkbox"/>                       | <input type="checkbox"/> | <input type="checkbox"/>            | <input type="checkbox"/>       |           |
| Sonstige 3<br>_____                   | <input type="checkbox"/>                             | <input type="checkbox"/>                       | <input type="checkbox"/> | <input type="checkbox"/>            | <input type="checkbox"/>       |           |

## Supplementary material

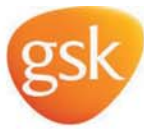

COPD UDM | DQ

### Biomarker bei der COPD

Betrachten Sie eine oder mehrere der folgenden diagnostischen Maßnahmen (bei der initialen Diagnose und/oder Verlaufskontrollen) als relevante Biomarker bei der COPD?

Bitte alle zutreffenden ankreuzen

- High-sensitive CRP
- Eosinophile im Blut
- Eosinophile im Sputum
- IgE – Gesamt
- Sonstige (bitte angeben): \_\_\_\_\_

Welche Weiterbildungsmaßnahmen halten Sie für notwendig, um das Wissen über die Eigenschaften von Biomarkern für COPD-Patienten zu verbreiten?

Bitte alle zutreffenden Punkte ankreuzen

- Präsentation von Studienergebnisse zu den Eigenschaften von Biomarkern bei Symposien und / oder in Qualitätszirkeln  
Falls für Sie zutreffend – in welchem Rahmen?
  - International
  - National
  - Regional/Lokal
- Angebote für Ärzte zur Teilnahme an Studien, die die Eigenschaften von Biomarkern untersuchen
- Verteilung von Daten zu den Eigenschaften von Biomarkern an die privaten und gesetzlichen Krankenversicherer
- Verteilung von Daten zu den Eigenschaften von Biomarkern an Patientenverbände
- Verteilung von Daten zu den Eigenschaften von Biomarkern an die Patienten
  - als Broschüre
  - über das Internet
  - über das Fernsehen
  - in Printmedien
- Sonstige (bitte angeben): \_\_\_\_\_

---

 Ort/Datum

---

 Unterschrift
